# Supplementary material for: Patient-reported outcome measures for clinical decision-making in outpatient follow-up: validity and reliability of a renal disease questionnaire
Source: PubMed Central journal article supplement (PMC8520563; doi:10.1186/s41687-021-00384-0), 2021-10-16

In this questionnaire, you must answer questions about your blood pressure, heart rate and weight. Please follow the instructions below.

#### Location of the cuff

- Blood pressure is measured on the same arm each time
- The cuff is placed around the bare arm and stretched around the upper arm, there must be no clothing tightening on the arm
- The cuff must not be tight. A finger must easily be placed between the cuff and the upper arm
- The cuff is placed on the upper arm a few centimetres above the elbow with the air tube to the middle and inwards

#### The measurement

- You should preferably measure your blood pressure in the morning before taking your morning medication
- You must sit comfortably reclined against the backrest in a chair WITHOUT crossed legs for 5 minutes and have the opportunity to sit undisturbed. Do not talk or move during the measurement
- You make 3 measurements at 2-minute intervals
- You must enter the last blood pressure you measured in the questionnaire

### What is your blood pressure today?

Write the systolic blood pressure here:

Write the diastolic blood pressure here:

### What is your heart rate today?

Write the answer here:

### What is your weight today (without shoes)?

kg:

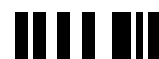

During the past 4 weeks, to what extent were you bothered by each of the following?

|                          |                                        |                                      |                                        |                                       |                                       |
|--------------------------|----------------------------------------|--------------------------------------|----------------------------------------|---------------------------------------|---------------------------------------|
| Lack of appetite         | <input type="checkbox"/><br>Not at all | <input type="checkbox"/><br>Somewhat | <input type="checkbox"/><br>Moderately | <input type="checkbox"/><br>Very much | <input type="checkbox"/><br>Extremely |
| Aversion to food         | <input type="checkbox"/><br>Not at all | <input type="checkbox"/><br>Somewhat | <input type="checkbox"/><br>Moderately | <input type="checkbox"/><br>Very much | <input type="checkbox"/><br>Extremely |
| Feeling of unease        | <input type="checkbox"/><br>Not at all | <input type="checkbox"/><br>Somewhat | <input type="checkbox"/><br>Moderately | <input type="checkbox"/><br>Very much | <input type="checkbox"/><br>Extremely |
| Nausea                   | <input type="checkbox"/><br>Not at all | <input type="checkbox"/><br>Somewhat | <input type="checkbox"/><br>Moderately | <input type="checkbox"/><br>Very much | <input type="checkbox"/><br>Extremely |
| Vomiting                 | <input type="checkbox"/><br>Not at all | <input type="checkbox"/><br>Somewhat | <input type="checkbox"/><br>Moderately | <input type="checkbox"/><br>Very much | <input type="checkbox"/><br>Extremely |
| Itchy skin               | <input type="checkbox"/><br>Not at all | <input type="checkbox"/><br>Somewhat | <input type="checkbox"/><br>Moderately | <input type="checkbox"/><br>Very much | <input type="checkbox"/><br>Extremely |
| Shortness of breath      | <input type="checkbox"/><br>Not at all | <input type="checkbox"/><br>Somewhat | <input type="checkbox"/><br>Moderately | <input type="checkbox"/><br>Very much | <input type="checkbox"/><br>Extremely |
| Swollen legs             | <input type="checkbox"/><br>Not at all | <input type="checkbox"/><br>Somewhat | <input type="checkbox"/><br>Moderately | <input type="checkbox"/><br>Very much | <input type="checkbox"/><br>Extremely |
| Dizziness                | <input type="checkbox"/><br>Not at all | <input type="checkbox"/><br>Somewhat | <input type="checkbox"/><br>Moderately | <input type="checkbox"/><br>Very much | <input type="checkbox"/><br>Extremely |
| Difficulty remembering   | <input type="checkbox"/><br>Not at all | <input type="checkbox"/><br>Somewhat | <input type="checkbox"/><br>Moderately | <input type="checkbox"/><br>Very much | <input type="checkbox"/><br>Extremely |
| Difficulty concentrating | <input type="checkbox"/><br>Not at all | <input type="checkbox"/><br>Somewhat | <input type="checkbox"/><br>Moderately | <input type="checkbox"/><br>Very much | <input type="checkbox"/><br>Extremely |

How much of the time during the past 4 weeks did you feel restless legs discomfort?

|   |                                             |                                              |                                                    |                                              |                                                  |                                              |
|---|---------------------------------------------|----------------------------------------------|----------------------------------------------------|----------------------------------------------|--------------------------------------------------|----------------------------------------------|
| · | <input type="checkbox"/><br>All of the time | <input type="checkbox"/><br>Most of the time | <input type="checkbox"/><br>A good bit of the time | <input type="checkbox"/><br>Some of the time | <input type="checkbox"/><br>A little of the time | <input type="checkbox"/><br>None of the time |
|---|---------------------------------------------|----------------------------------------------|----------------------------------------------------|----------------------------------------------|--------------------------------------------------|----------------------------------------------|

How much of the time during the past 4 weeks did you feel tired?

|   |                                             |                                              |                                                    |                                              |                                                  |                                              |
|---|---------------------------------------------|----------------------------------------------|----------------------------------------------------|----------------------------------------------|--------------------------------------------------|----------------------------------------------|
| · | <input type="checkbox"/><br>All of the time | <input type="checkbox"/><br>Most of the time | <input type="checkbox"/><br>A good bit of the time | <input type="checkbox"/><br>Some of the time | <input type="checkbox"/><br>A little of the time | <input type="checkbox"/><br>None of the time |
|---|---------------------------------------------|----------------------------------------------|----------------------------------------------------|----------------------------------------------|--------------------------------------------------|----------------------------------------------|

How much bodily pain have you had during the past 4 weeks?

|   |                                  |                                       |                                  |                                      |                                    |                                         |
|---|----------------------------------|---------------------------------------|----------------------------------|--------------------------------------|------------------------------------|-----------------------------------------|
| · | <input type="checkbox"/><br>None | <input type="checkbox"/><br>Very mild | <input type="checkbox"/><br>Mild | <input type="checkbox"/><br>Moderate | <input type="checkbox"/><br>Severe | <input type="checkbox"/><br>Very severe |
|---|----------------------------------|---------------------------------------|----------------------------------|--------------------------------------|------------------------------------|-----------------------------------------|

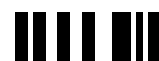

During the past week:

|                                                     |                                        |                                      |                                         |                                       |
|-----------------------------------------------------|----------------------------------------|--------------------------------------|-----------------------------------------|---------------------------------------|
| Were you limited in doing regular daily activities? | <input type="checkbox"/><br>Not at all | <input type="checkbox"/><br>A little | <input type="checkbox"/><br>Quite a bit | <input type="checkbox"/><br>Very much |
| Have you been constipated?                          | <input type="checkbox"/><br>Not at all | <input type="checkbox"/><br>A little | <input type="checkbox"/><br>Quite a bit | <input type="checkbox"/><br>Very much |
| Have you had diarrhoea?                             | <input type="checkbox"/><br>Not at all | <input type="checkbox"/><br>A little | <input type="checkbox"/><br>Quite a bit | <input type="checkbox"/><br>Very much |
| Have you had to urinate frequently at night?        | <input type="checkbox"/><br>Not at all | <input type="checkbox"/><br>A little | <input type="checkbox"/><br>Quite a bit | <input type="checkbox"/><br>Very much |
| Have you had trouble sleeping at night?             | <input type="checkbox"/><br>Not at all | <input type="checkbox"/><br>A little | <input type="checkbox"/><br>Quite a bit | <input type="checkbox"/><br>Very much |
| Were you worried about your future health?          | <input type="checkbox"/><br>Not at all | <input type="checkbox"/><br>A little | <input type="checkbox"/><br>Quite a bit | <input type="checkbox"/><br>Very much |

How often do you have difficulty remembering to take all your medication?

|                          |                          |                          |                          |
|--------------------------|--------------------------|--------------------------|--------------------------|
| <input type="checkbox"/> | <input type="checkbox"/> | <input type="checkbox"/> | <input type="checkbox"/> |
| Daily                    | Weekly                   | Monthly                  | Never/Rarely             |



General health

|                                                                          |                                                               |                                                                   |                                                            |                                                                  |                                                              |
|--------------------------------------------------------------------------|---------------------------------------------------------------|-------------------------------------------------------------------|------------------------------------------------------------|------------------------------------------------------------------|--------------------------------------------------------------|
| In general, would you say your health is:                                | <input type="checkbox"/><br>Excellent                         | <input type="checkbox"/><br>Very good                             | <input type="checkbox"/><br>Good                           | <input type="checkbox"/><br>Fair                                 | <input type="checkbox"/><br>Poor                             |
| Compared to one year ago, how would you rate your health in general now? | <input type="checkbox"/><br>Much better now than one year ago | <input type="checkbox"/><br>Somewhat better now than one year ago | <input type="checkbox"/><br>About the same as one year ago | <input type="checkbox"/><br>Somewhat worse now than one year ago | <input type="checkbox"/><br>Much worse now than one year ago |

What is most important for you to discuss with your physician in the upcoming consultation? Up to 3 topics may be stated:

Topic 1:

Topic 2:

Topic 3:

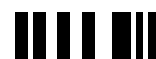

Supplement: 41687_2021_384_MOESM2_ESM.pdf [file 41687_2021_384_MOESM2_ESM.pdf]
