# Supplementary material for: Patient-reported outcome measures for clinical decision-making in outpatient follow-up: validity and reliability of a renal disease questionnaire
Source: PubMed Central journal article supplement (PMC8520563; doi:10.1186/s41687-021-00384-0), 2021-10-16
Supplement: 41687_2021_384_MOESM1_ESM.pdf [file 41687_2021_384_MOESM1_ESM.pdf]

## *Interview guide*

*No, date:*

*Sex:*

*Age:*

*Number of years followed in the outpatient clinic:*

## *Introduction, purpose and duration of the interview*

In front of you is a questionnaire and I will ask you to complete this while you think aloud. Afterwards, I have a few overall questions relating to the questionnaire.

## *Questions asked while the patient is completing the questionnaire*

### **Comprehensibility**

- After reading the introduction, to what extent do you feel confident in your ability to complete the questionnaire?
- What does this (word / phrase) mean to you?
- Could you repeat this, putting the question into your own words?
- I noticed you hesitated. Do you want to tell me your thoughts?
- Do you think it will be difficult for others to answer that question?

### **Response options**

- Was it difficult to answer this question? Why?
- Is your answer among these possible response options?
- Could you tell me how you came up with this response (answer option) in this question? How did you decide?

### **Topics**

- Could you explain what you mean by e.g. "an exhausting fatigue" in your own words?
- Where should we insert this question to make the most sense for you?

## *Follow-up questions (semi-structured interview)*

### **Comprehensibility**

- To what extent do you feel confident in completing the questionnaire?
- Did you find some of the questions confusing or were some of the

questions difficult to understand?

Were there any of the answer options you did not understand / or did not seem to make sense? Which? Why?

**Relevance**

- Did you find any topics in the questionnaire that you do not associate with your illness?
- Could we possibly remove any questions? Why? Repetitions?
- Which topics do you think are the most important in order to get the best possible description of how you feel on the day you answer this questionnaire?

**Comprehensiveness/Gaps**

- Do you find any issues or concerns relating to your illness missing in the questionnaire? Which?
- Could you think of one or more specific questions that could contribute to a better understanding of your illness? Which?
- To what extent do you feel that these questions help you to put your well-being into words?
- What do you think about the length of the questionnaire?

**Additions**

- Could you name something you would like to have been asked about, which is not present in the questionnaire?
- From what we have discussed here, do you have some additional comments or important summary points?

## *Interview protocol – focus group*

No:

Sex:

Age:

Role in organisation:

## *Introduction, purpose and duration of the interview*

In front of you is a questionnaire and I will ask you to complete this while you all think aloud. During the process, I will ask you additional overall questions.

## *Questions asked while the clinicians complete the questionnaire (semi-structured interview)*

### **Comprehensibility**

- After reading the introduction, to what extent do you feel confident in your ability to complete the questionnaire?
- Did you find some of the questions confusing or were some of the questions difficult to understand?
- Are there any of the answer options you did not understand / or did not seem to make sense? Which? Why?
- To what extent do you feel confident in completing the questionnaire?

### **Relevance**

- In which situations do you experience that kidney disease affects patients the most? Why?
- Which questions are most important to you in the consultations?
- In your experience, which symptoms/questions indicate a worsening in the patients' kidney function/or the patients' well-being?
- In your opinion, which of these questions are the best indicators of the patients' well-being?
- In your experience, does the questionnaire contain questions not relevant for patients to answer due to their illness? Which?
- Could we possibly remove any questions? Why? Repetitions?

### **Comprehensiveness/Gaps**

- Do you find any domains relating to chronic kidney disease missing in the questionnaire? Which?

- To what extent do you feel that these questions help patients to put their symptoms into words?
- What do you think about the length of the questionnaire?

**Additions**

- Could you think of one or more specific questions that could contribute to a better understanding of chronic kidney disease?  
Which?
- After our discussion, do you have some additional comments or important summary points?
