# Supplementary material for: Patient-reported outcome measures for clinical decision-making in outpatient follow-up: validity and reliability of a renal disease questionnaire
Source: PubMed Central journal article supplement (PMC8520563; doi:10.1186/s41687-021-00384-0), 2021-10-16
Supplement: 41687_2021_384_MOESM4_ESM.pdf [file 41687_2021_384_MOESM4_ESM.pdf]

**Supplementary table 1. Results from the cognitive interviewing with patients and clinicians in the outpatient nephrology clinics (n = 14)**

| <b>Patients, (n = 8)</b>                                                                                                                                        | <b>Clinicians, (n = 6)</b>                                                                                                                                               |
|-----------------------------------------------------------------------------------------------------------------------------------------------------------------|--------------------------------------------------------------------------------------------------------------------------------------------------------------------------|
| <b>Emerged items</b>                                                                                                                                            |                                                                                                                                                                          |
| Free textbox                                                                                                                                                    | Free textbox                                                                                                                                                             |
| Physical pain                                                                                                                                                   | Pain                                                                                                                                                                     |
| Restless legs                                                                                                                                                   | Sexual life                                                                                                                                                              |
| Gastrointestinal function                                                                                                                                       |                                                                                                                                                                          |
| <b>Rephrasing of items</b>                                                                                                                                      |                                                                                                                                                                          |
| Bothered by... instead of plagued by...<br>[In headlines]<br>Worried about your future<br>Health replaces concern for the future<br>Experiencing other problems | Medication adherence<br>Nocturnal urination                                                                                                                              |
| <b>Items removed from the questionnaire</b>                                                                                                                     |                                                                                                                                                                          |
| Legcramps                                                                                                                                                       | Additional question on medication adherence                                                                                                                              |
|                                                                                                                                                                 | Thirst                                                                                                                                                                   |
| <b>Considerations on comprehensiveness and relevance</b>                                                                                                        |                                                                                                                                                                          |
| Reflect individual issues<br>Short and concise<br>Use of the questionnaire in the clinical encounter<br>Clear purpose of this questionnaire                     | Need for teaching patients on the content and purpose of the PRO measures<br>Manageable<br>Meaningful and relevance in the consultation<br>Length and burden to patients |
