# Supplementary material for: Patient-reported outcome measures for clinical decision-making in outpatient follow-up: validity and reliability of a renal disease questionnaire
Source: PubMed Central journal article supplement (PMC8520563; doi:10.1186/s41687-021-00384-0), 2021-10-16
Supplement: 41687_2021_384_MOESM5_ESM.pdf [file 41687_2021_384_MOESM5_ESM.pdf]

**Supplementary table 2. Agreement and reliability between the items from test 1 to test 2 in original categories (n = 160)**

| Item                                          | N   | Levels | %min <sup>1)</sup><br>(floor) | %max <sup>1)</sup><br>(Ceiling) | Agreement/Exp<br>agreement (%) | KW (95% CI)     | Perfect<br>agreement<br>n (%) | P-<br>value |
|-----------------------------------------------|-----|--------|-------------------------------|---------------------------------|--------------------------------|-----------------|-------------------------------|-------------|
| Lack of appetite                              | 159 | 5      | 75                            | 2                               | 99.1/89.9                      | 0.91(0.85;0.95) | 139(87)                       | 0.36        |
| Aversion to food                              | 159 | 5      | 81                            | 2                               | 98.3/92.3                      | 0.85(0.70;0.93) | 139(87)                       | 0.007       |
| Nausea                                        | 159 | 4      | 81                            | -                               | 98.7/92.0                      | 0.84(0.70;0.92) | 144(91)                       | 0.43        |
| Vomiting                                      | 158 | 5      | 93                            | -                               | 98.6/95.4                      | 0.69(0.32;0.90) | 152(96)                       | 0.42        |
| Itchy skin                                    | 158 | 5      | 45                            | 1                               | 97.9/88.8                      | 0.81(0.74;0.87) | 117(74)                       | 0.001       |
| Dizziness                                     | 156 | 5      | 54                            | 1                               | 98.9/92.5                      | 0.85(0.78;0.91) | 128(82)                       | 0.25        |
| Constipation                                  | 159 | 4      | 79                            | -                               | 95.8/85.8                      | 0.70(0.56;0.82) | 135(85)                       | 0.41        |
| Diarrhoea                                     | 159 | 4      | 65                            | 2                               | 97.6/90.5                      | 0.74(0.61;0.85) | 130(82)                       | 0.09        |
| Swollen legs                                  | 160 | 4      | 50                            | 4                               | 97.1/84.7                      | 0.81(0.69;0.88) | 129 (81)                      | 0.37        |
| Dyspnoea                                      | 159 | 5      | 71                            | -                               | 96.9/87.4                      | 0.75(0.63;0.84) | 129(81)                       | 0.14        |
| Daily activities                              | 160 | 4      | 60                            | 2                               | 97.6/86.6                      | 0.83(0.74;0.88) | 129(81)                       | 0.05        |
| Pain                                          | 159 | 6      | 50                            | 0.6                             | 97.7/89.6                      | 0.78(0.70;0.86) | 112(70)                       | 0.27        |
| Restless legs                                 | 159 | 6      | 40                            | 4                               | 97.1/86.8                      | 0.78(0.69;0.84) | 99(62)                        | 0.27        |
| Fatigue                                       | 159 | 6      | 14                            | 4                               | 97.1/84.7                      | 0.81(0.73;0.87) | 88(55)                        | 0.005       |
| Nocturnal awakening                           | 160 | 4      | 46                            | 3                               | 96.1/85.0                      | 0.75(0.64;0.84) | 120(75)                       | 0.21        |
| Nightly frequent<br>urination                 | 160 | 4      | 33                            | 5                               | 96.7/81.8                      | 0.82(0.75;0.88) | 121(76)                       | 0.002       |
| Feeling of unease                             | 159 | 5      | 63                            | 1                               | 98.2/93.1                      | 0.73(0.63;0.82) | 121(76)                       | 0.51        |
| Memory                                        | 159 | 5      | 46                            | 1                               | 98.4/90.0                      | 0.84(0.77;0.90) | 124(78)                       | 0.01        |
| Concentration                                 | 158 | 5      | 63                            | 0.5                             | 97.4/90.9                      | 0.72(0.53;0.86) | 128(81)                       | 0.75        |
| Future concerns                               | 160 | 4      | 41                            | 5                               | 96.1/86.3                      | 0.72(0.59;0.82) | 118(74)                       | 0.06        |
| Medicine adherence                            | 160 | 4      | 89                            | -                               | 98.3/95.6                      | 0.61(0.34;0.83) | 150(93)                       | 0.06        |
| General health                                | 160 | 5      | 2                             | 10                              | 97.7/89.9                      | 0.78(0.71;0.83) | 105(66)                       | 0.15        |
| Self-rated health<br>compared to last<br>year | 160 | 5      | 2                             | 2                               | 98.6/94.8                      | 0.73(0.60;0.84) | 134(84)                       | 0.69        |

Abbreviations: Exp: Expected; KW: Weighted kappa with squared weights; CI: Confidence interval; P-value derived from wilcoxon.

<sup>1)</sup>Floor and Ceiling represent the most extreme response category in each item
