# Supplementary material for: Patient-reported outcome measures for clinical decision-making in outpatient follow-up: validity and reliability of a renal disease questionnaire
Source: PubMed Central journal article supplement (PMC8520563; doi:10.1186/s41687-021-00384-0), 2021-10-16
Supplement: 41687_2021_384_MOESM6_ESM.pdf [file 41687_2021_384_MOESM6_ESM.pdf]

| <b>Supplementary table 3. Sensitivity analyses showing agreement and reliability between the items from test 1 to test 2 in original categories (n = 204)</b> |          |               |                                    |                    |                                |                |
|---------------------------------------------------------------------------------------------------------------------------------------------------------------|----------|---------------|------------------------------------|--------------------|--------------------------------|----------------|
| <b>Item</b>                                                                                                                                                   | <b>N</b> | <b>Levels</b> | <b>Agreement/Exp agreement (%)</b> | <b>KW (95% CI)</b> | <b>Perfect agreement n (%)</b> | <b>P-value</b> |
| Lack of appetite                                                                                                                                              | 203      | 5             | 98.7/90.4                          | 0.87 (0.80;0.92)   | 174 (87)                       | 0.34           |
| Aversion to food                                                                                                                                              | 203      | 5             | 98.8/92.9                          | 0.83 (0.72;0.91)   | 175 (86)                       | 0.01           |
| Nausea                                                                                                                                                        | 203      | 4             | 97.8/91.4                          | 0.76 (0.62;0.85)   | 173 (85)                       | 0.98           |
| Vomiting                                                                                                                                                      | 202      | 5             | 97.5/94.4                          | 0.56 (0.27;0.82)   | 174 (86)                       | 0.99           |
| Itchy skin                                                                                                                                                    | 202      | 5             | 97.0/87.5                          | 0.76 (0.65;0.84)   | 147 (72)                       | 0.01           |
| Dizziness                                                                                                                                                     | 200      | 5             | 98.4/91.7                          | 0.80 (0.70;0.87)   | 159 (79)                       | 0.19           |
| Constipation                                                                                                                                                  | 202      | 4             | 97.9/92.6                          | 0.72 (0.59;0.80)   | 168 (83)                       | 0.23           |
| Diarrhoea                                                                                                                                                     | 202      | 4             | 97.0/90.3                          | 0.69 (0.56;0.80)   | 162 (80)                       | 0.39           |
| Swollen legs                                                                                                                                                  | 204      | 4             | 96.6/84.7                          | 0.78 (0.68;0.85)   | 155 (75)                       | 0.12           |
| Dyspnoea                                                                                                                                                      | 202      | 5             | 97.8/92.2                          | 0.72 (0.59;0.83)   | 160 (79)                       | 0.10           |
| Daily activities                                                                                                                                              | 204      | 4             | 97.2/84.8                          | 0.81 (0.75;0.87)   | 158 (77)                       | 0.24           |
| Pain                                                                                                                                                          | 203      | 6             | 97.3/88.8                          | 0.76 (0.68;0.84)   | 139 (68)                       | 0.17           |
| Restless legs                                                                                                                                                 | 203      | 6             | 96.8/85.3                          | 0.78 (0.70;0.84)   | 123 (60)                       | 0.15           |
| Fatigue                                                                                                                                                       | 203      | 6             | 96.9/83.4                          | 0.82 (0.74;0.86)   | 107 (52)                       | 0.000          |
| Nocturnal awakening                                                                                                                                           | 204      | 5             | 96.4/85.4                          | 0.75 (0.66;0.83)   | 156 (76)                       | 0.08           |
| Nightly frequent urination                                                                                                                                    | 203      | 4             | 96.1/81.7                          | 0.78 (0.69;0.85)   | 149 (73)                       | 0.01           |
| Feeling of unease                                                                                                                                             | 203      | 5             | 97.6/92.3                          | 0.69 (0.58;0.78)   | 151 (74)                       | 0.52           |
| Memory                                                                                                                                                        | 203      | 5             | 98.2/90.1                          | 0.82 (0.75;0.87)   | 143 (70)                       | 0.03           |
| Concentration                                                                                                                                                 | 203      | 5             | 97.5/91.5                          | 0.72 (0.56;0.84)   | 145 (71)                       | 0.90           |
| Future concerns                                                                                                                                               | 203      | 5             | 95.9/83.3                          | 0.75 (0.66;0.84)   | 151 (74)                       | 0.26           |
| Medicine adherence                                                                                                                                            | 204      | 4             | 98.1/95.5                          | 0.59 (0.37;0.78)   | 188 (92)                       | 0.13           |
| Self-rated health                                                                                                                                             | 204      | 5             | 97.5/88.6                          | 0.78 (0.72;0.83)   | 134 (65)                       | 0.03           |
| Self-rated health compared to last year                                                                                                                       | 204      | 5             | 98.4/94.3                          | 0.72 (0.60;0.81)   | 167 (81)                       | 0.88           |
| Abbreviations: Exp: Expected; KW: Weighted kappa with squared weights; CI: Confidence interval; P-value derived from wilcoxon.                                |          |               |                                    |                    |                                |                |
