# Supplementary material for: Patient-reported outcome measures for clinical decision-making in outpatient follow-up: validity and reliability of a renal disease questionnaire
Source: PubMed Central journal article supplement (PMC8520563; doi:10.1186/s41687-021-00384-0), 2021-10-16
Supplement: 41687_2021_384_MOESM7_ESM.pdf [file 41687_2021_384_MOESM7_ESM.pdf]

**Supplementary Table 4. Known groups (discriminative validity) stratified into CKD stage 3b and stage 4 and 5 at time for test 1 among 233 patients with chronic kidney disease**

|                         | Total    | Renal function (CKD stages)  |                             | p-value <sup>1</sup> |
|-------------------------|----------|------------------------------|-----------------------------|----------------------|
| Item                    | N (%)    | Stage 3b<br>n = 141<br>n (%) | Stage 4-5<br>n =92<br>n (%) |                      |
| <b>Lack of appetite</b> |          |                              |                             | 0.03                 |
| Not at all              | 164(70)  | 108(77)                      | 56(62)                      |                      |
| Somewhat                | 39(16)   | 19(14)                       | 20(22)                      |                      |
| Moderately              | 13(6)    | 7(5)                         | 6(6)                        |                      |
| Very much               | 13(6)    | 5(3)                         | 8(9)                        |                      |
| Extremely               | 3(2)     | 2(1)                         | 1(1)                        |                      |
| <b>Itchy skin</b>       |          |                              |                             | 0.02                 |
| Not at all              | 104 (45) | 74 (52)                      | 30 (33)                     |                      |
| Somewhat                | 82 (36)  | 41 (29)                      | 41 (45)                     |                      |
| Moderately              | 21 (9)   | 14 (10)                      | 7 (8)                       |                      |
| Very much               | 19 (8)   | 10 (8)                       | 9 (10)                      |                      |
| Extremely               | 5 (2)    | 2 (1)                        | 3 (3)                       |                      |
| <b>Dyspnoea</b>         |          |                              |                             | 0.85                 |
| Not at all              | 154 (66) | 94 (67)                      | 60 (66)                     |                      |
| Somewhat                | 48 (21)  | 26 (18)                      | 22 (24)                     |                      |
| Moderately              | 21 (9)   | 14 (10)                      | 7 (8)                       |                      |
| Very much               | 8 (3)    | 7 (5)                        | 1 (1)                       |                      |
| Extremely               | 1 (-)    | -                            | 1 (1)                       |                      |
| <b>General health</b>   |          |                              |                             | <0.001               |
| Excellent               | 17 (7)   | 14 (10)                      | 3 (3)                       |                      |
| Very good               | 49 (21)  | 36 (26)                      | 13 (14)                     |                      |
| Good                    | 102 (45) | 61 (43)                      | 41 (45)                     |                      |
| Fair                    | 52 (22)  | 27 (19)                      | 25 (28)                     |                      |
| Poor                    | 12 (5)   | 3 (2)                        | 9 (10)                      |                      |
| <b>Adherence</b>        |          |                              |                             | 0.45                 |
| Daily                   | -        | -                            | -                           |                      |
| Weekly                  | 7 (3)    | 5 (4)                        | 2 (2)                       |                      |
| Monthly                 | 14 (6)   | 6 (4)                        | 8 (9)                       |                      |
| Never/Rarely            | 210 (91) | 129 (92)                     | 81 (89)                     |                      |
| <b>Dizziness</b>        |          |                              |                             | 0.33                 |
| Not at all              | 115 (50) | 74 (52)                      | 41 (46)                     |                      |
| Somewhat                | 87 (38)  | 51 (36)                      | 36 (41)                     |                      |
| Moderately              | 20 (9)   | 12 (9)                       | 8 (9)                       |                      |
| Very much               | 5 (2)    | 2 (2)                        | 3 (3)                       |                      |
| Extremely               | 3 (1)    | 2 (1)                        | 1 (1)                       |                      |
| <b>Concentration</b>    |          |                              |                             | 0.68                 |
| Not at all              | 127 (55) | 79 (57)                      | 48 (53)                     |                      |
| Somewhat                | 72 (31)  | 41 (29)                      | 31 (34)                     |                      |
| Moderately              | 25 (11)  | 16 (11)                      | 9 (10)                      |                      |
| Very much               | 6 (3)    | 4 (3)                        | 2 (2)                       |                      |
| Extremely               | 1 (-)    | -                            | 1 (1)                       |                      |
| <b>Memory</b>           |          |                              |                             | 0.74                 |
| Not at all              | 93 (40)  | 58 (41)                      | 35 (38)                     |                      |

|                            |          |          |         |       |
|----------------------------|----------|----------|---------|-------|
| Somewhat                   | 96 (41)  | 56 (40)  | 40 (44) |       |
| Moderately                 | 30 (14)  | 22 (15)  | 8 (9)   |       |
| Very much                  | 10 (4)   | 4 (3)    | 6 (7)   |       |
| Extremely                  | 3 (1)    | 1 (1)    | 2 (2)   |       |
| <b>Nausea</b>              |          |          |         | 0.09  |
| Not at all                 | 179 (77) | 114 (81) | 65 (72) |       |
| Somewhat                   | 35 (15)  | 18 (13)  | 17 (19) |       |
| Moderately                 | 15 (7)   | 8 (5)    | 7 (8)   |       |
| Very much                  | 3 (1)    | 1 (1)    | 2 (2)   |       |
| Extremely                  | -        | -        | -       |       |
| <b>Aversion to food</b>    |          |          |         | 0.10  |
| Not at all                 | 181 (78) | 115 (82) | 66 (73) |       |
| Somewhat                   | 29 (13)  | 15 (11)  | 14 (15) |       |
| Moderately                 | 13 (6)   | 7 (5)    | 6 (6)   |       |
| Very much                  | 6 (3)    | 2 (1)    | 4 (5)   |       |
| Extremely                  | 3 (1)    | 2 (1)    | 1 (1)   |       |
| <b>Vomiting</b>            |          |          |         | 0.16  |
| Not at all                 | 217 (94) | 135 (96) | 82 (91) |       |
| Somewhat                   | 10 (4)   | 3 (2)    | 7 (8)   |       |
| Moderately                 | 4 (2)    | 3 (2)    | 1 (1)   |       |
| Very much                  | -        | -        | -       |       |
| Extremely                  | -        | -        | -       |       |
| <b>Daily activities</b>    |          |          |         | 0.003 |
| Not at all                 | 130 (56) | 90 (64)  | 40 (44) |       |
| A little                   | 67 (29)  | 34 (24)  | 33 (36) |       |
| Quite a bit                | 27 (12)  | 14 (10)  | 13 (14) |       |
| Very much                  | 8 (3)    | 3 (2)    | 5 (6)   |       |
| <b>Future concerns</b>     |          |          |         | 0.04  |
| Not at all                 | 85 (37)  | 56 (40)  | 29 (32) |       |
| A little                   | 113 (49) | 71 (50)  | 42 (46) |       |
| Quite a bit                | 19 (8)   | 8 (6)    | 11 (12) |       |
| Very much                  | 15 (6)   | 6 (4)    | 9 (10)  |       |
| <b>Nocturnal awakening</b> |          |          |         | 0.77  |
| Not at all                 | 101 (44) | 63 (45)  | 38 (42) |       |
| A little                   | 82 (35)  | 48 (34)  | 34 (37) |       |
| Quite a bit                | 39 (17)  | 24 (17)  | 15 (17) |       |
| Very much                  | 10 (4)   | 6 (4)    | 4 (4)   |       |
| <b>Fatigue</b>             |          |          |         | 0.35  |
| All of the time            | 14 (6)   | 7 (5)    | 7 (8)   |       |
| Most of the time           | 31 (13)  | 16 (11)  | 15 (16) |       |
| A good bit of the time     | 45 (19)  | 28 (20)  | 17 (19) |       |
| Some of the time           | 44 (19)  | 29 (21)  | 15 (16) |       |
| A little of the time       | 70 (31)  | 40 (28)  | 30 (33) |       |
| None of the time           | 28 (12)  | 21 (15)  | 7 (8)   |       |
| <b>Restless legs</b>       |          |          |         | 0.01  |
| All of the time            | 10 (4)   | 3 (2)    | 7 (8)   |       |
| Most of the time           | 14 (6)   | 8 (6)    | 6 (7)   |       |
| A good bit of the time     | 23 (10)  | 14 (10)  | 9 (19)  |       |
| Some of the time           | 32 (14)  | 15 (11)  | 17 (19) |       |
| A little of the time       | 64 (28)  | 39 (27)  | 25 (27) |       |

|                                             |          |          |         |        |
|---------------------------------------------|----------|----------|---------|--------|
| None of the time                            | 89 (39)  | 62 (44)  | 27 (30) |        |
| <b>Swollen legs</b>                         |          |          |         | <0.001 |
| Not at all                                  | 108 (46) | 84 (59)  | 24 (26) |        |
| Somewhat                                    | 83 (36)  | 40 (29)  | 43 (47) |        |
| Moderately                                  | 32 (14)  | 13 (9)   | 19 (21) |        |
| Very much                                   | 9 (4)    | 4 (3)    | 5 (6)   |        |
| Extremely                                   | -        | -        | -       |        |
| <b>Constipation</b>                         |          |          |         | 0.13   |
| Not at all                                  | 173 (75) | 111 (78) | 62 (69) |        |
| A little                                    | 44 (19)  | 21 (15)  | 23 (26) |        |
| Quite a bit                                 | 13 (6)   | 8 (6)    | 5 (5)   |        |
| Very much                                   | 1 (-)    | 1 (1)    | -       |        |
| <b>Diarrhoea</b>                            |          |          |         | 0.15   |
| Not at all                                  | 154 (67) | 99 (71)  | 55 (61) |        |
| A little                                    | 63 (27)  | 32 (23)  | 31 (34) |        |
| Quite a bit                                 | 6 (4)    | 6 (4)    | 4 (4)   |        |
| Very much                                   | 3 (2)    | 3 (2)    | 1 (1)   |        |
| <b>Nightly frequent urination</b>           |          |          |         | 0.03   |
| Not at all                                  | 69 (30)  | 50 (36)  | 19 (21) |        |
| A little                                    | 84 (36)  | 48 (34)  | 36 (39) |        |
| Quite a bit                                 | 62 (27)  | 34 (24)  | 28 (31) |        |
| Very much                                   | 16 (7)   | 8 (6)    | 8 (9)   |        |
| <b>Feeling of unease</b>                    |          |          |         | 0.13   |
| Not at all                                  | 136 (59) | 89 (63)  | 47 (52) |        |
| Somewhat                                    | 62 (27)  | 32 (23)  | 30 (33) |        |
| Moderately                                  | 26 (11)  | 15 (10)  | 11 (12) |        |
| Very much                                   | 5 (2)    | 3 (2)    | 2 (2)   |        |
| Extremely                                   | 3 (1)    | 2 (2)    | 1 (1)   |        |
| <b>Pain</b>                                 |          |          |         | 0.02   |
| None                                        | 109 (47) | 74 (52)  | 35 (39) |        |
| Very mild                                   | 48 (21)  | 29 (22)  | 19 (21) |        |
| Mild                                        | 45 (20)  | 23 (16)  | 22 (24) |        |
| Moderate                                    | 24 (10)  | 13 (9)   | 11 (12) |        |
| Severe                                      | 3 (1)    | 2 (1)    | 1 (1)   |        |
| Very severe                                 | 3 (1)    | -        | 3 (3)   |        |
| <b>General health compared to last year</b> |          |          |         | 0.02   |
| Much better                                 | 8 (3)    | 7 (5)    | 1 (1)   |        |
| Somewhat better                             | 20 (9)   | 13 (9)   | 7 (8)   |        |
| About the same                              | 162 (70) | 102 (72) | 60 (66) |        |
| Somewhat worse                              | 35 (15)  | 15 (11)  | 20 (22) |        |
| Much worse                                  | 7 (3)    | 4 (3)    | 3 (3)   |        |

<sup>1)</sup>p-value testing difference between stage 3b vs. stage 4 and 5. Calculated by Mann-Whitney test
